# Supplementary material for: Biphenyl Ether Analogs Containing Pomalidomide as Small-Molecule Inhibitors of the Programmed Cell Death-1/Programmed Cell Death-Ligand 1 Interaction
Source: MDPI journal article supplement (doi:10.3390/molecules27113454), 2022-05-27
Supplement: s1 [file s1]

Chemical structure of compound 10 is shown in the top left corner. The <sup>1</sup>H NMR spectrum (CDCl<sub>3</sub>) displays the following peaks (ppm) and integration values:

| Chemical Shift (ppm) | Integration |
|----------------------|-------------|
| 11.38                | 1.01        |
| 8.84                 | 1.01        |
| 8.82                 | 1.01        |
| 8.81                 | 1.01        |
| 7.73                 | 1.11        |
| 7.72                 | 1.11        |
| 7.70                 | 1.11        |
| 7.69                 | 1.11        |
| 7.67                 | 1.11        |
| 7.64                 | 1.11        |
| 7.63                 | 1.11        |
| 7.60                 | 1.11        |
| 7.59                 | 1.11        |
| 7.54                 | 1.11        |
| 7.53                 | 1.11        |
| 7.52                 | 1.11        |
| 7.47                 | 1.11        |
| 7.39                 | 1.11        |
| 7.38                 | 1.11        |
| 7.37                 | 1.11        |
| 7.36                 | 1.11        |
| 7.31                 | 1.11        |
| 7.29                 | 1.11        |
| 7.23                 | 1.11        |
| 7.22                 | 1.11        |
| 7.22                 | 1.11        |
| 6.92                 | 1.11        |
| 6.90                 | 1.11        |
| 6.81                 | 1.11        |
| 6.81                 | 1.11        |
| 6.77                 | 1.11        |
| 6.77                 | 1.11        |
| 6.75                 | 1.11        |
| 6.58                 | 1.11        |
| 5.10                 | 1.11        |
| 5.09                 | 1.11        |
| 5.08                 | 1.11        |
| 5.07                 | 1.11        |
| 4.31                 | 1.11        |
| 3.19                 | 1.11        |
| 3.18                 | 1.11        |
| 3.16                 | 1.11        |
| 3.14                 | 1.11        |
| 3.09                 | 1.11        |
| 3.06                 | 1.11        |
| 3.05                 | 1.11        |
| 2.89                 | 1.11        |
| 2.87                 | 1.11        |
| 2.85                 | 1.11        |
| 2.76                 | 1.11        |
| 2.74                 | 1.11        |
| 2.27                 | 1.11        |
| 2.25                 | 1.11        |
| 2.06                 | 1.11        |
| 1.53                 | 1.11        |
| 1.50                 | 1.11        |
| 1.49                 | 1.11        |
| 1.47                 | 1.11        |
| 1.46                 | 1.11        |
| 1.44                 | 1.11        |

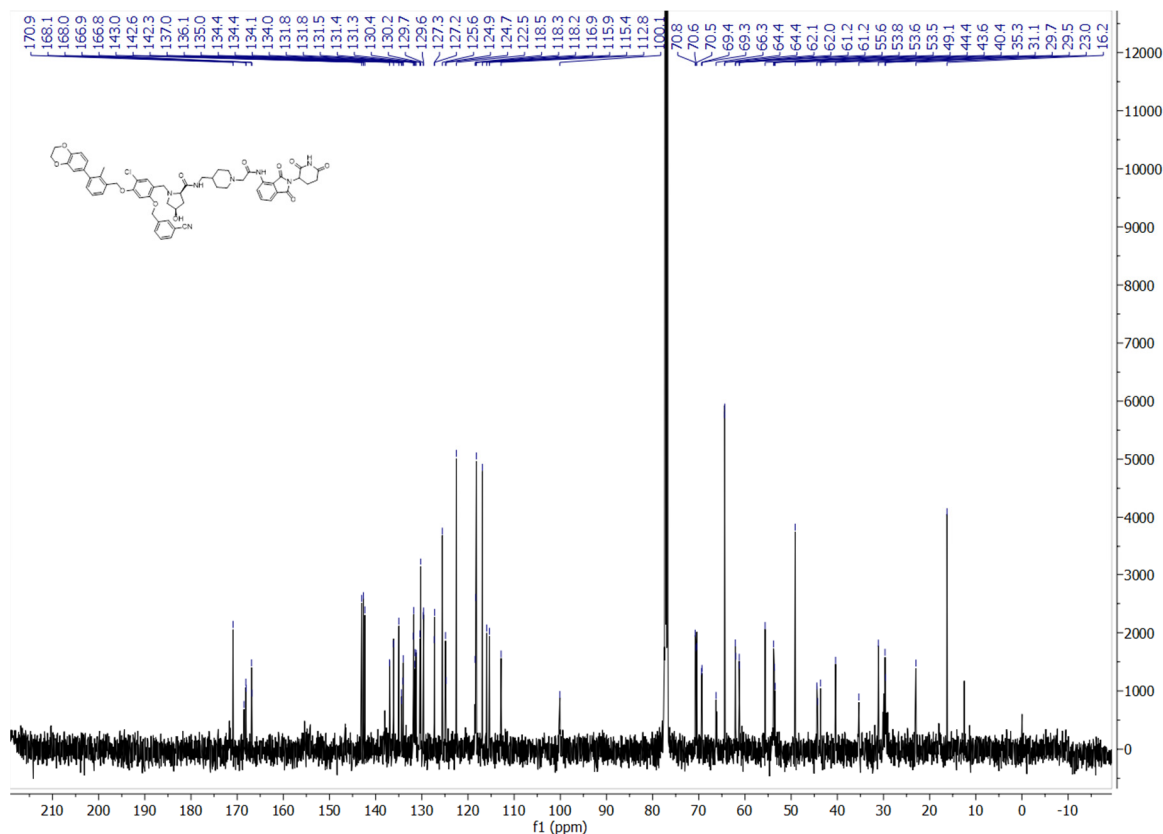

**Figure S1.** (2R,4R)-1-(5-chloro-2-((3-cyanobenzyl)oxy)-4-((3-(2,3-dihydrobenzo[b][1,4]dioxin-6-yl)-2-methylbenzyl)oxy)benzyl)-N-((1-(2-((2-(2,6-dioxopiperidin-3-yl)-1,3-dioxoisindolin-4-yl)amino)-2-oxoethyl)piperidin-4-yl)methyl)-4-hydroxypyrrolidine-2-carboxamide (**1**).

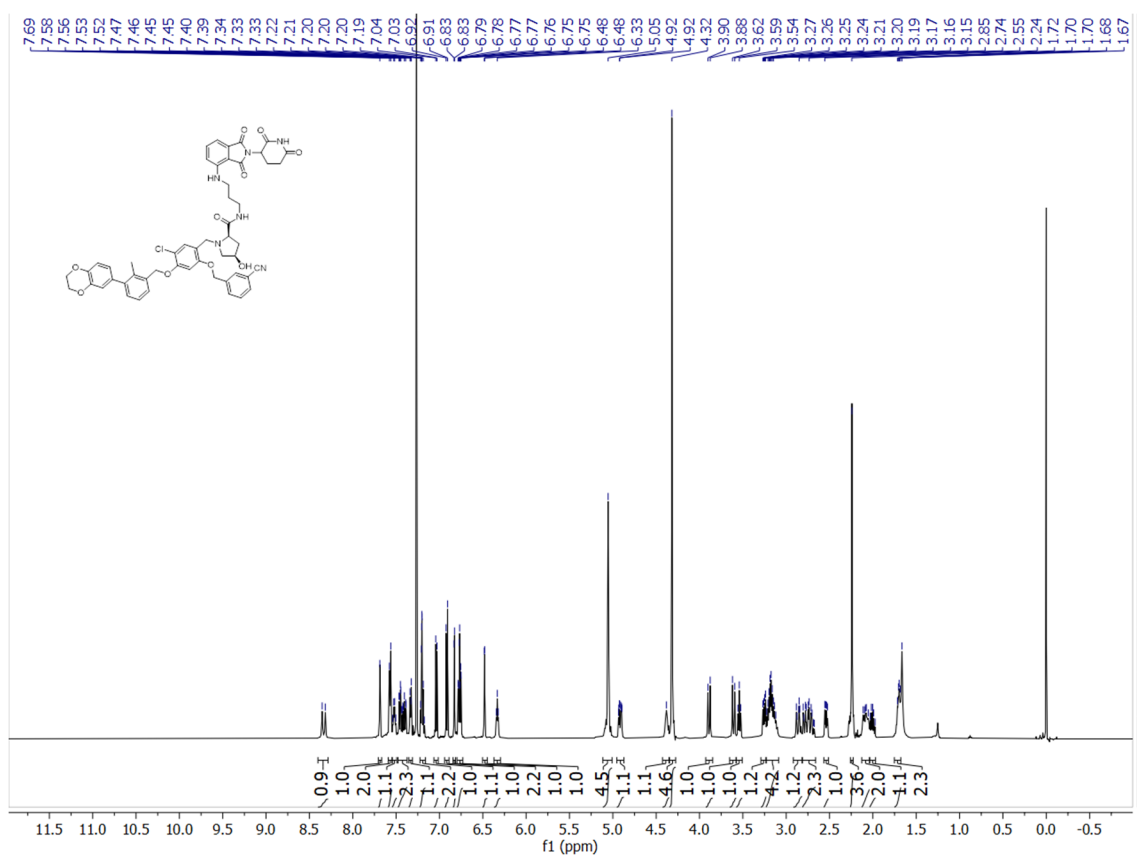

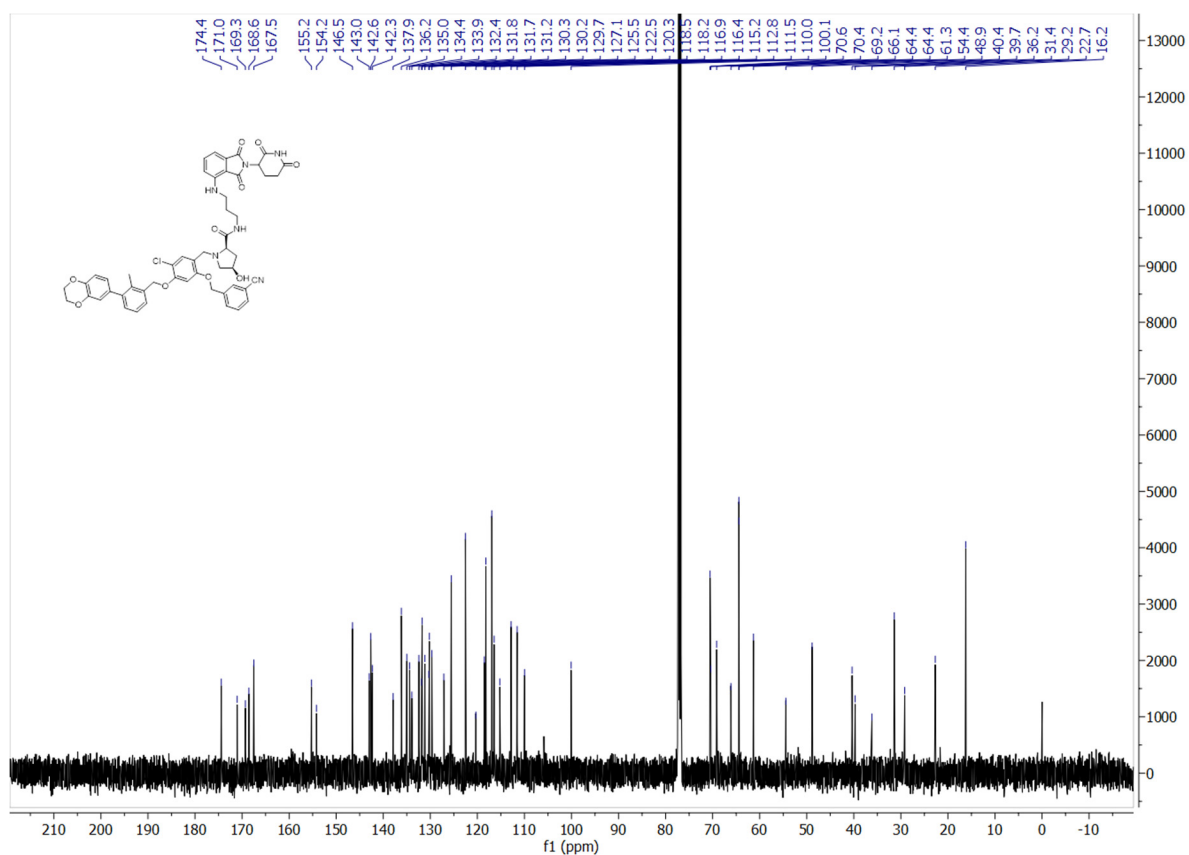

**Figure S2.** (2R,4R)-1-(5-chloro-2-((3-cyanobenzyl)oxy)-4-((3-(2,3-dihydrobenzo[b][1,4]dioxin-6-yl)-2-methylbenzyl)oxy)benzyl)-N-(3-((2-(2,6-dioxopiperidin-3-yl)-1,3-dioxoisindolin-4-yl)amino)propyl)-4-hydroxypyrrolidine-2-carboxamide (**2**).

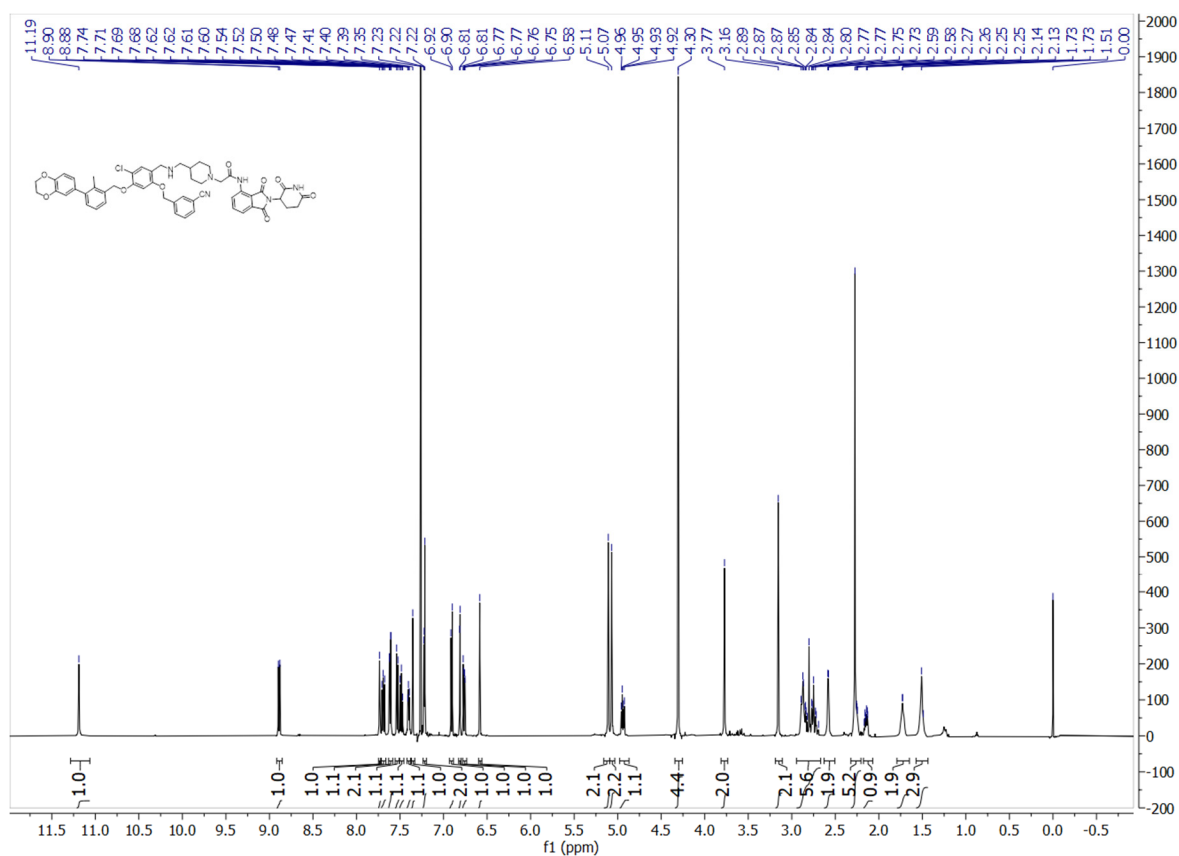

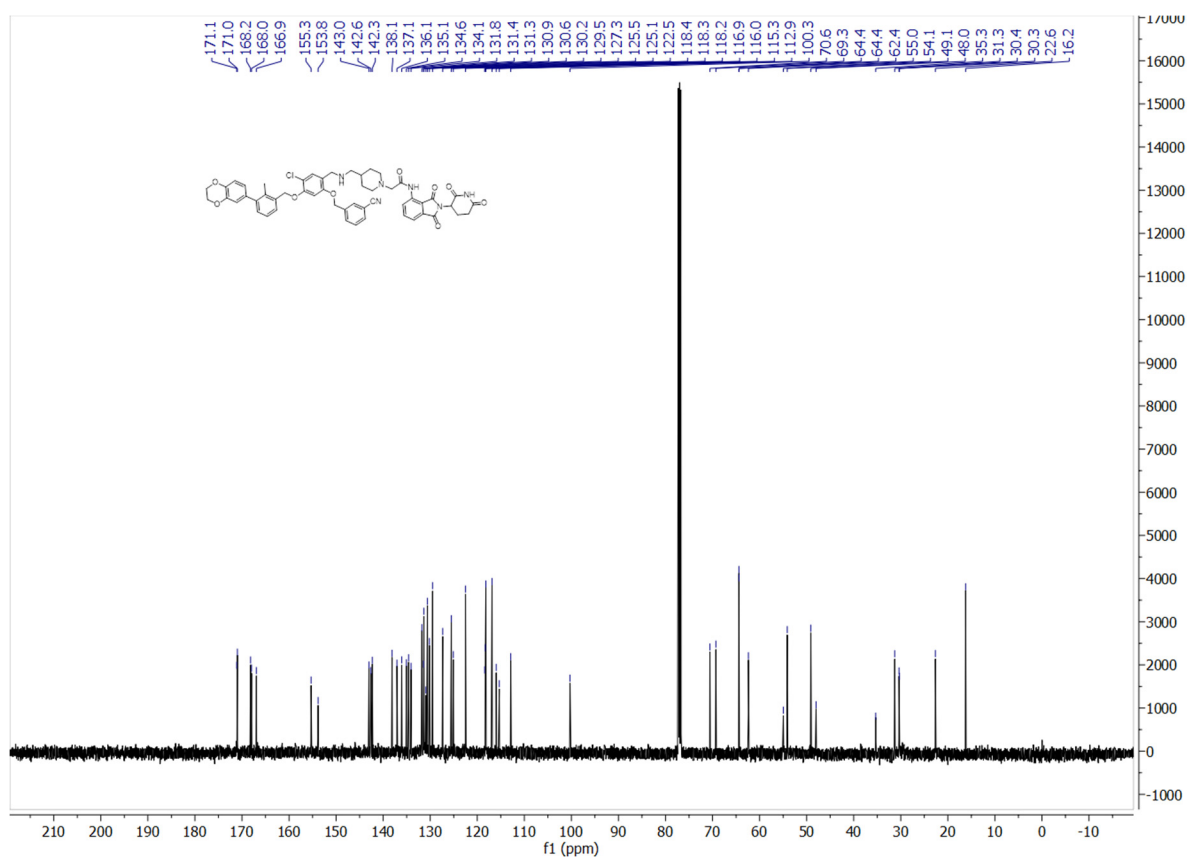

**Figure S3.** 2-(4-(((5-chloro-2-((3-cyanobenzyl)oxy)-4-((3-(2,3-dihydrobenzo[b][1,4]dioxin-6-yl)-2-methylbenzyl)oxy)benzyl)amino)methyl)piperidin-1-yl)-N-(2-(2,6-dioxopiperidin-3-yl)-1,3-dioxoisindolin-4-yl)acetamide (3).

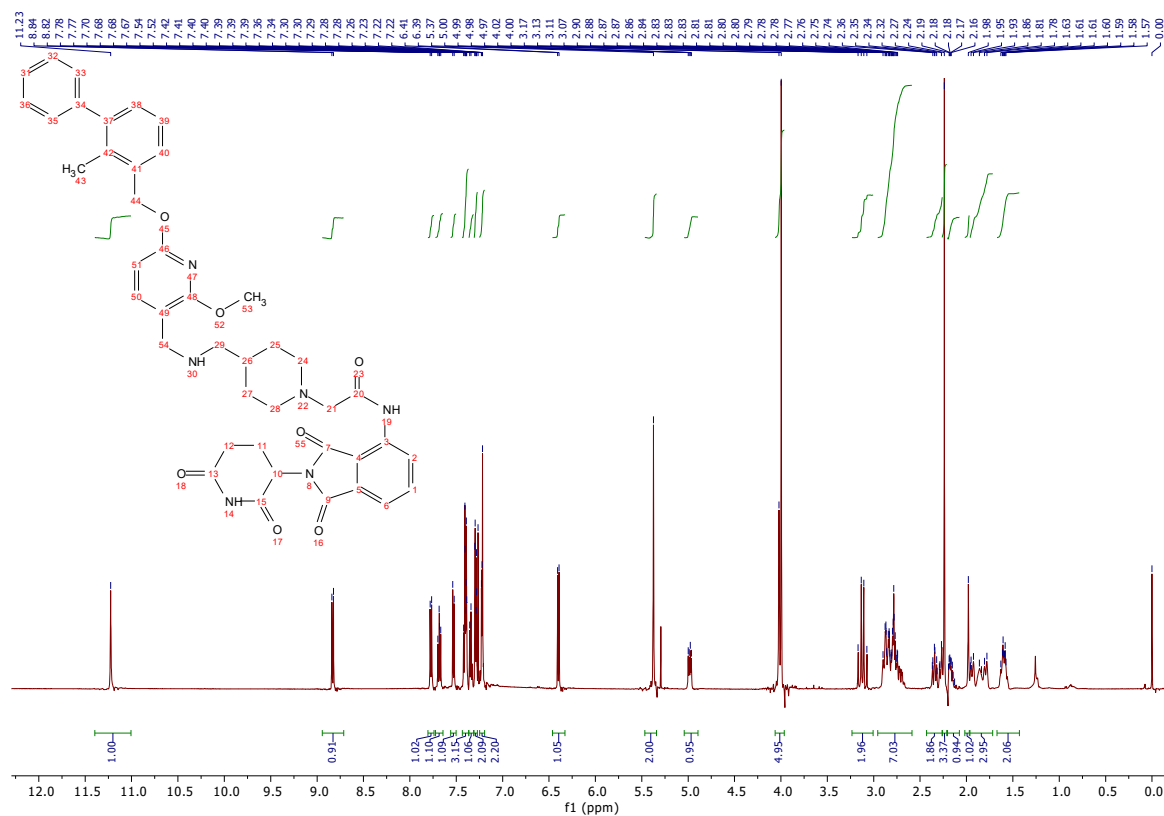

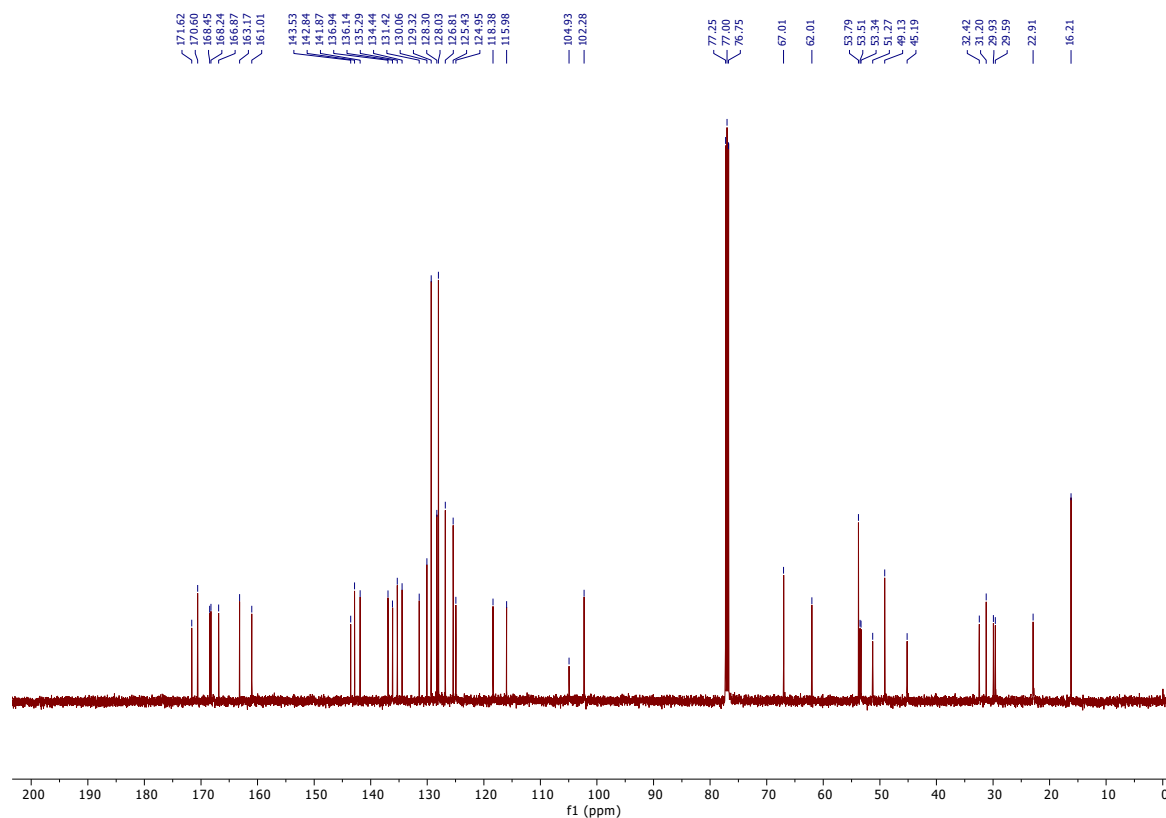

**Figure S4.** N-(2-(2,6-dioxopiperidin-3-yl)-1,3-dioxoisindolin-4-yl)-2-(4-(((2-methoxy-6-((2-methyl-[1,1'-biphenyl]-3-yl)methoxy)pyridin-3-yl)methyl)amino)methyl)piperidin-1-yl)acetamide (4).

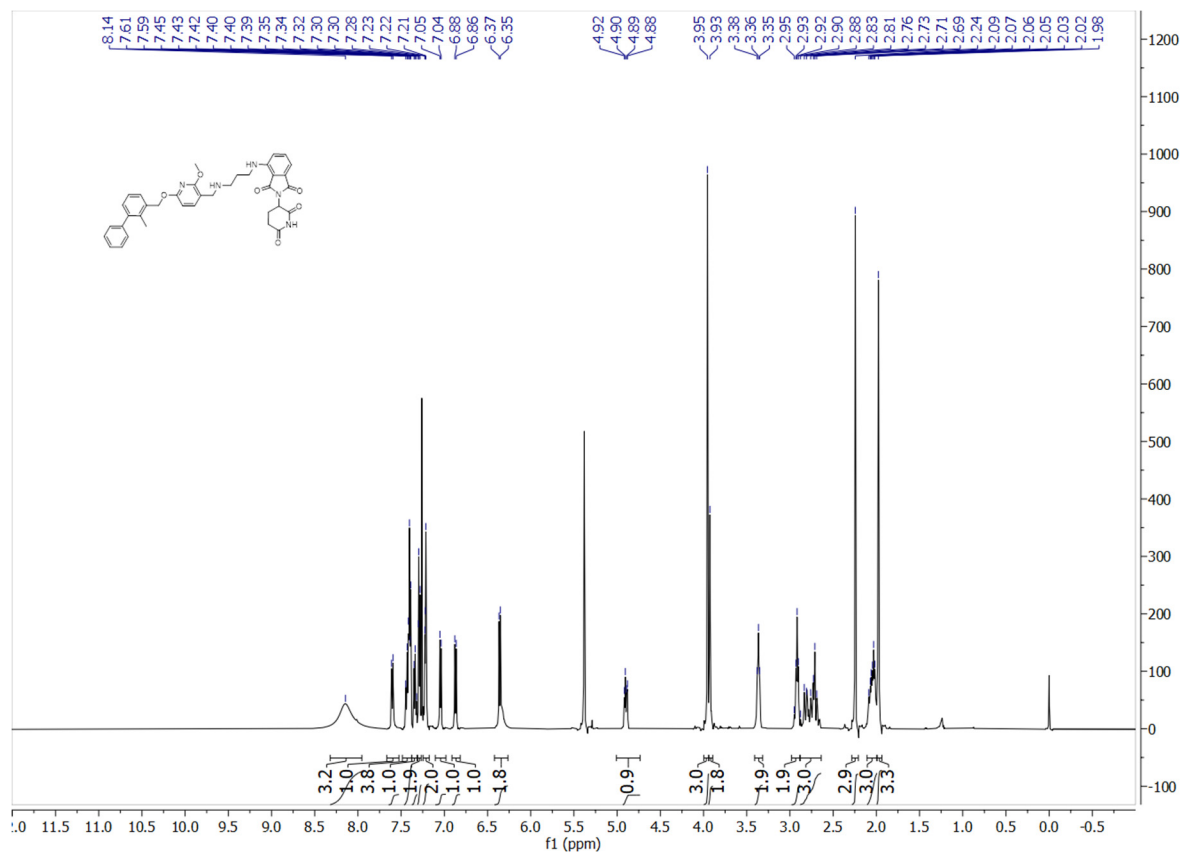

**Figure S5.** 2-(2-(2,6-dioxopiperidin-3-yl)-4-((3-(((2-methoxy-6-((2-methyl-[1,1'-biphenyl]-3-yl)methoxy)pyridin-3-yl)methyl)amino)propyl)amino)isoindoline-1,3-dione (5).

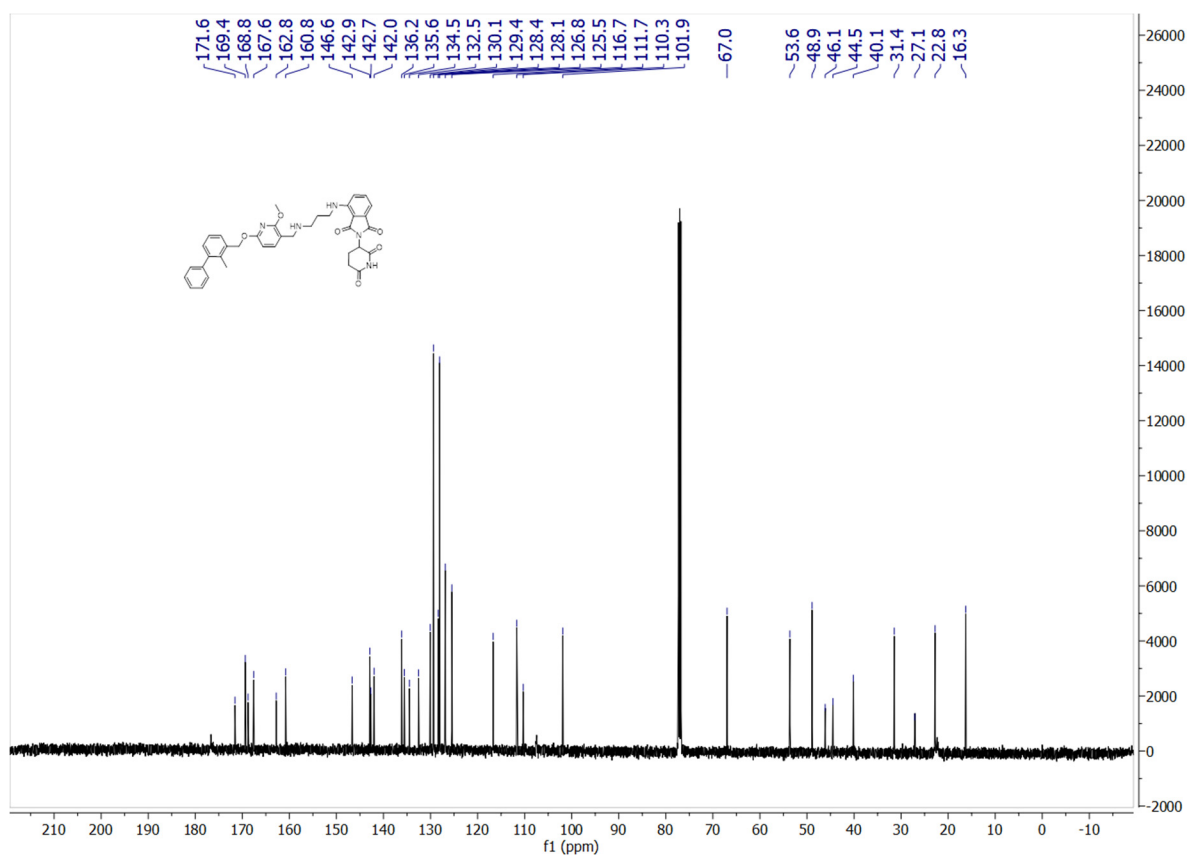

**Figure S6.** 2-(2-dioxopiperidin-3-yl)-4-((3-(((2-methoxy-6-((2-methyl-[1,1'-biphenyl]-3-yl)methoxy)pyridin-3-yl)methyl)amino)propyl)amino)isoindoline-1,3-dione (5).

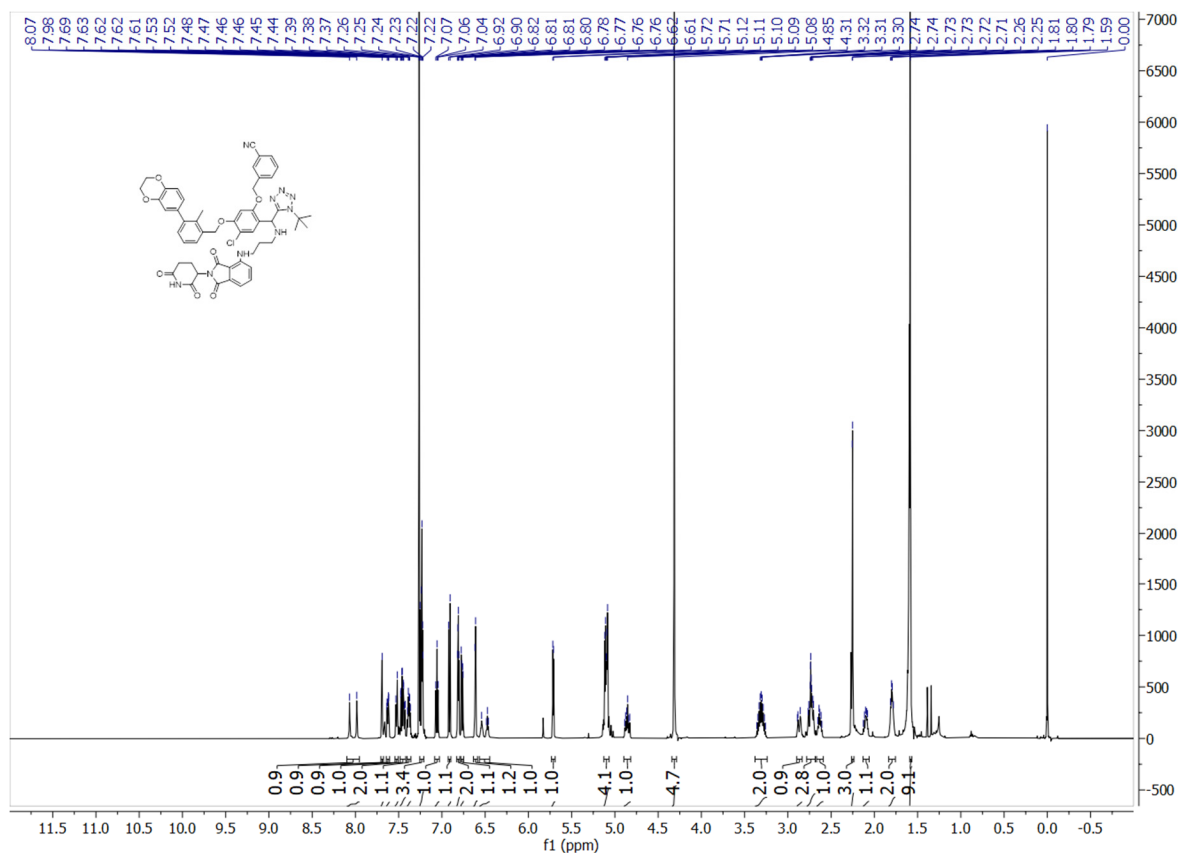

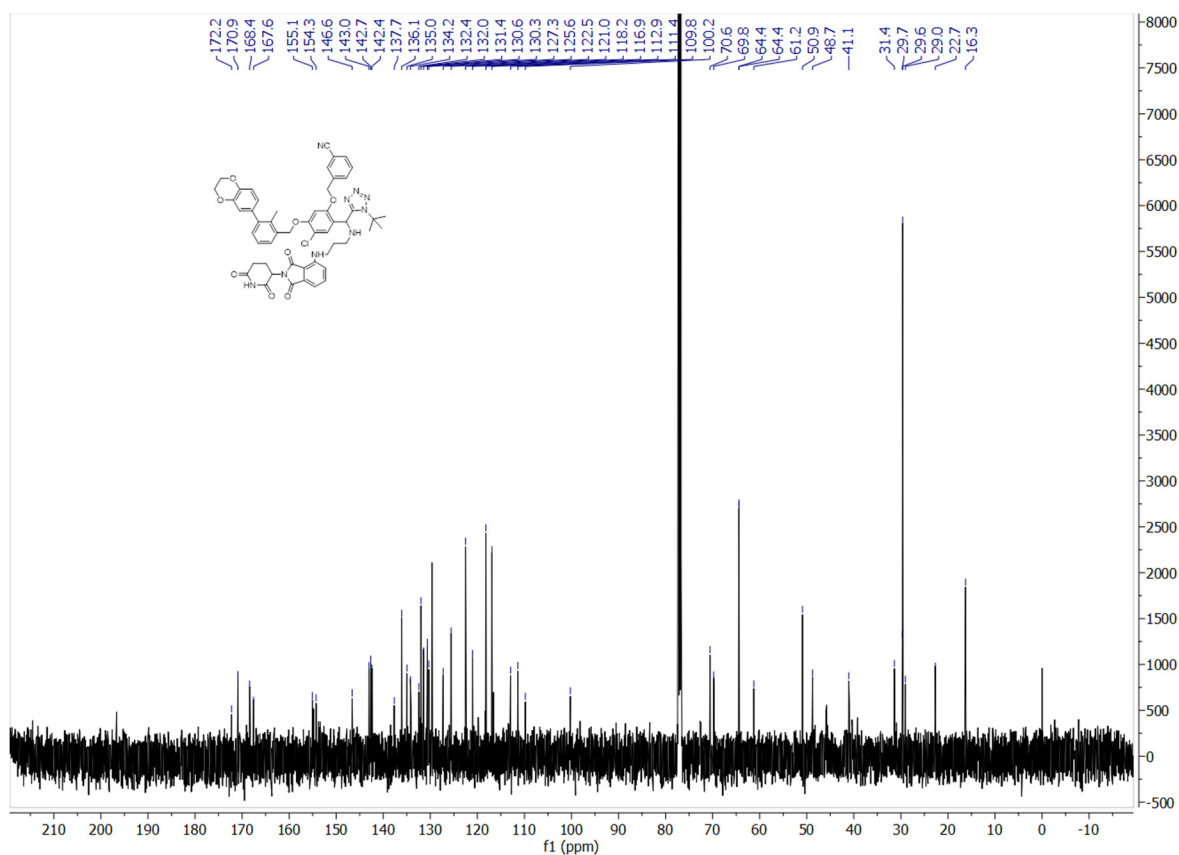

**Figure S7.**  $^3-((2-((1-(tert-butyl)-1H-tetrazol-5-yl)((3-((2-(2,6-dioxopiperidin-3-yl)-1,3-dioxoisindolin-4-yl)amino)propyl)amino)methyl)-4-chloro-5-((3-(2,3-dihydrobenzo[b][1,4]dioxin-6-yl)-2-methylbenzyl)oxy)phenoxy)methyl)benzonitrile$  (**6**).

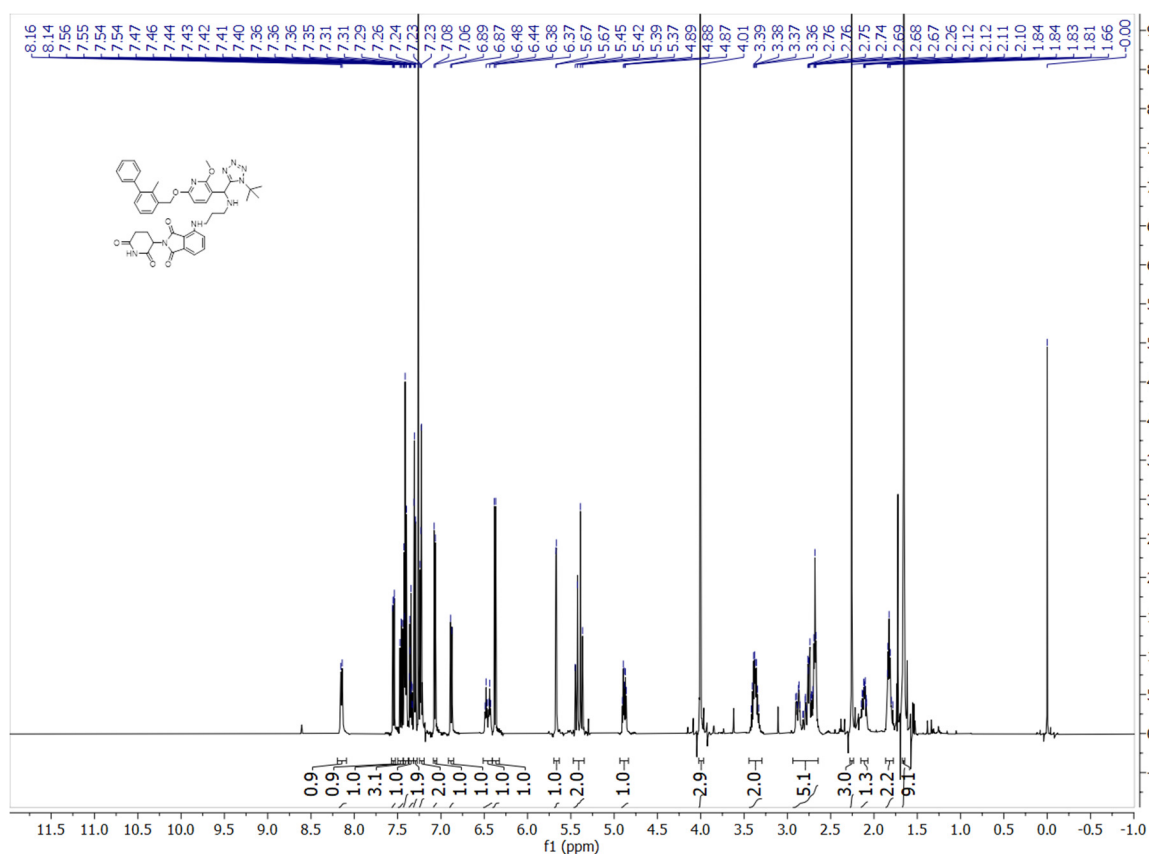

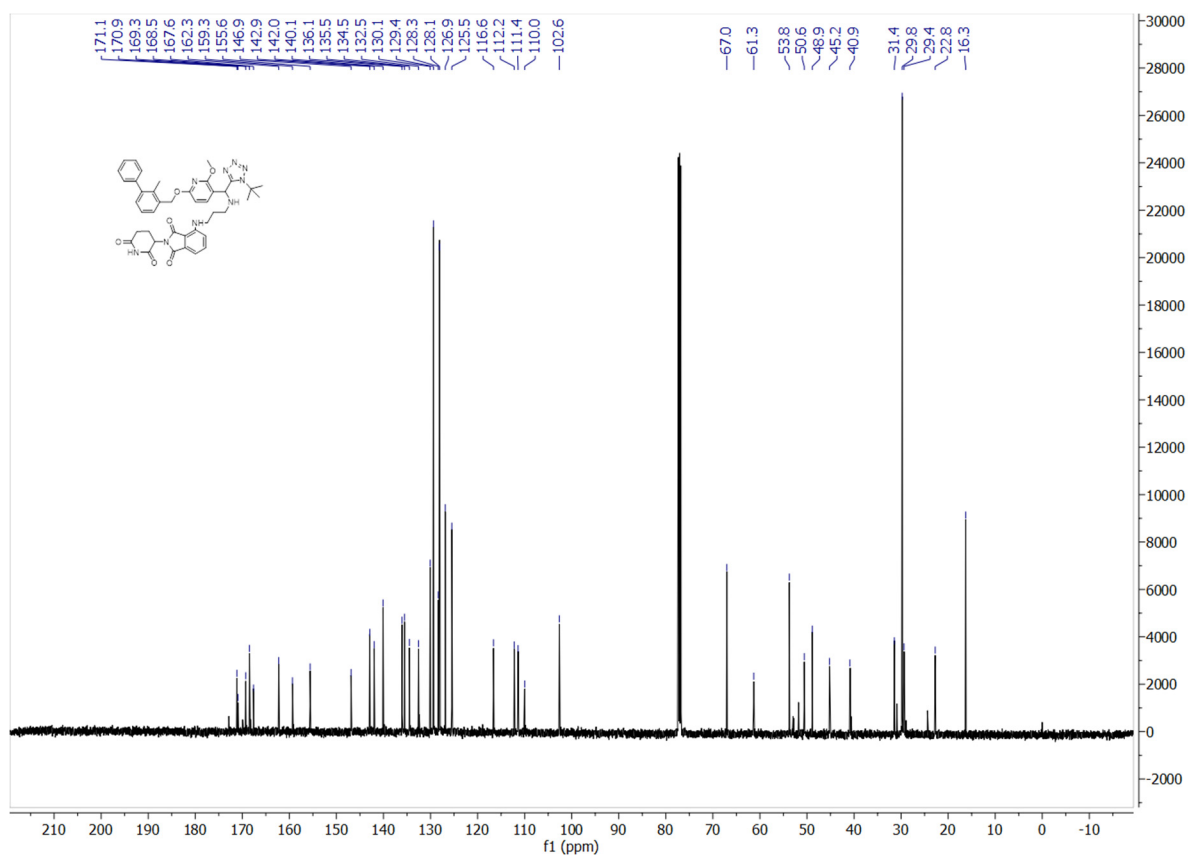

**Figure S8.**  $^{13}\text{C}$  NMR spectrum of 4-((3-(((1-(tert-butyl)-1H-tetrazol-5-yl)(2-methoxy-6-((2-methyl-[1,1'-biphenyl]-3-yl)methoxy)pyridin-3-yl)methyl)amino)propyl)amino)-2-(2,6-dioxopiperidin-3-yl)isoindoline-1,3-dione (7).

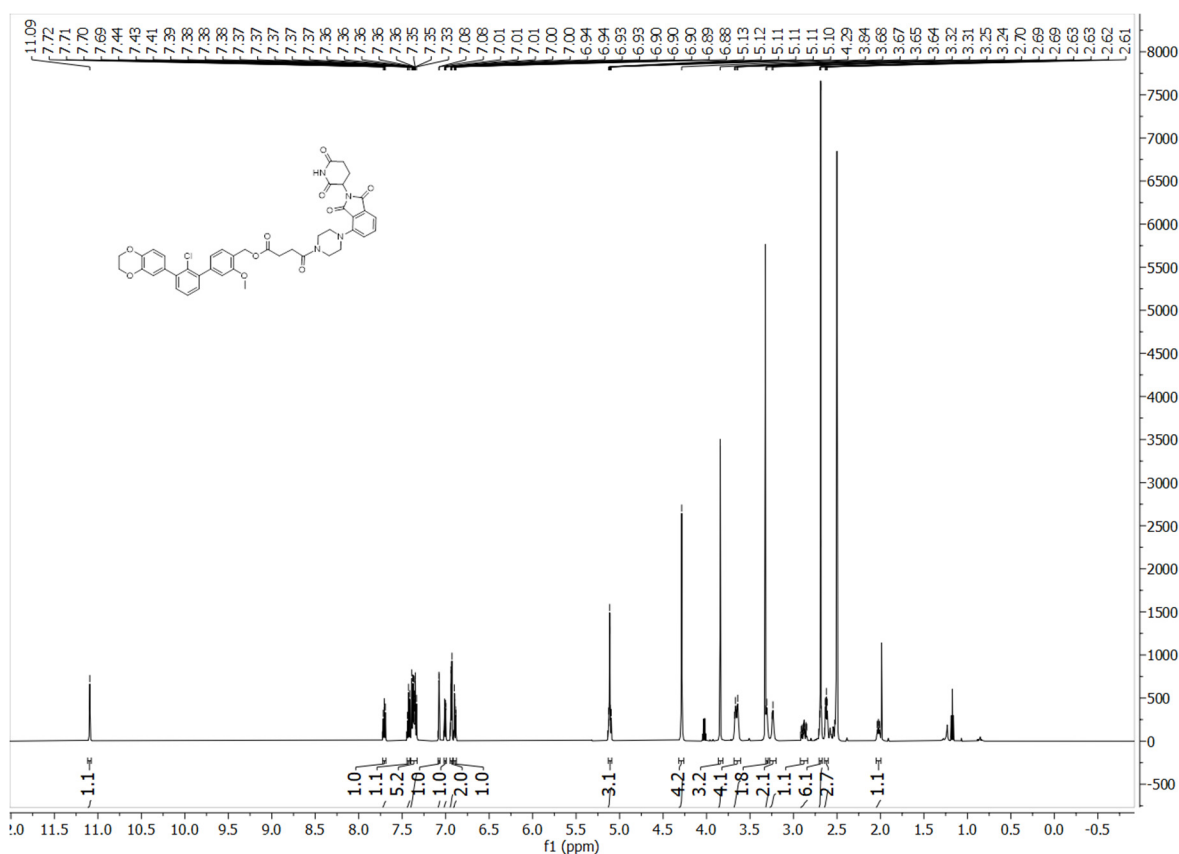



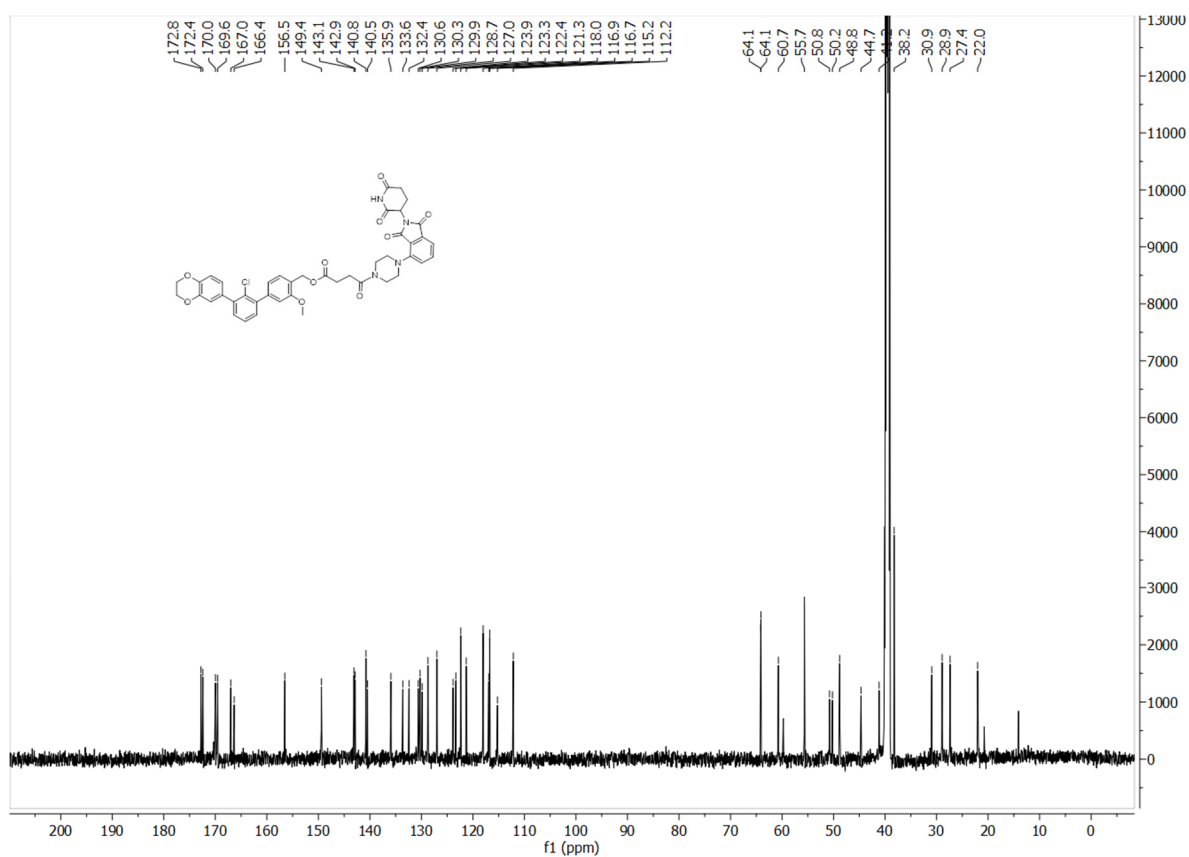

**Figure S9.** (3'-(benzo-1,4-dioxan-6-yl)-2'-chloro-3-methoxy-[1,1'-biphenyl]-4-yl)methyl 4-(4-(2-(2,6-dioxopiperidin-3-yl)-1,3-dioxoisindolin-4-yl)piperazin-1-yl)-4-oxobutanoate (**10**).

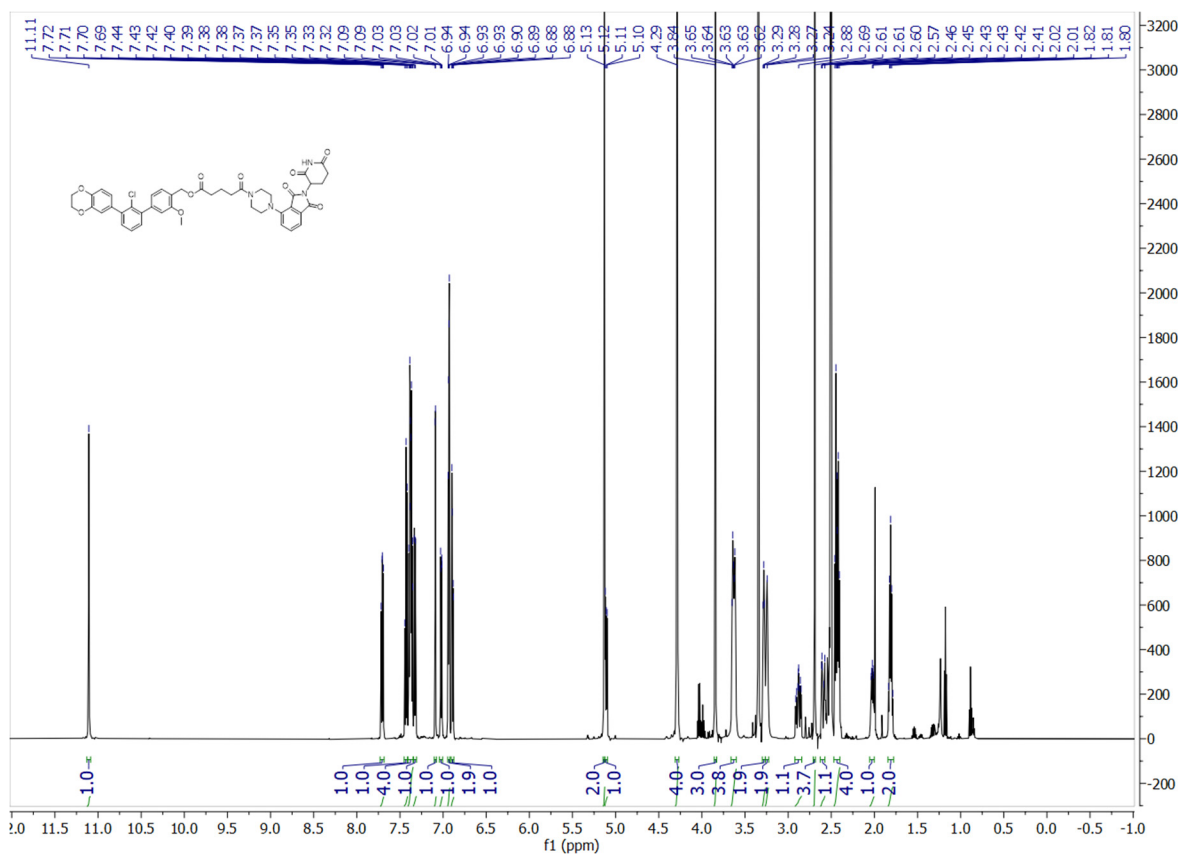

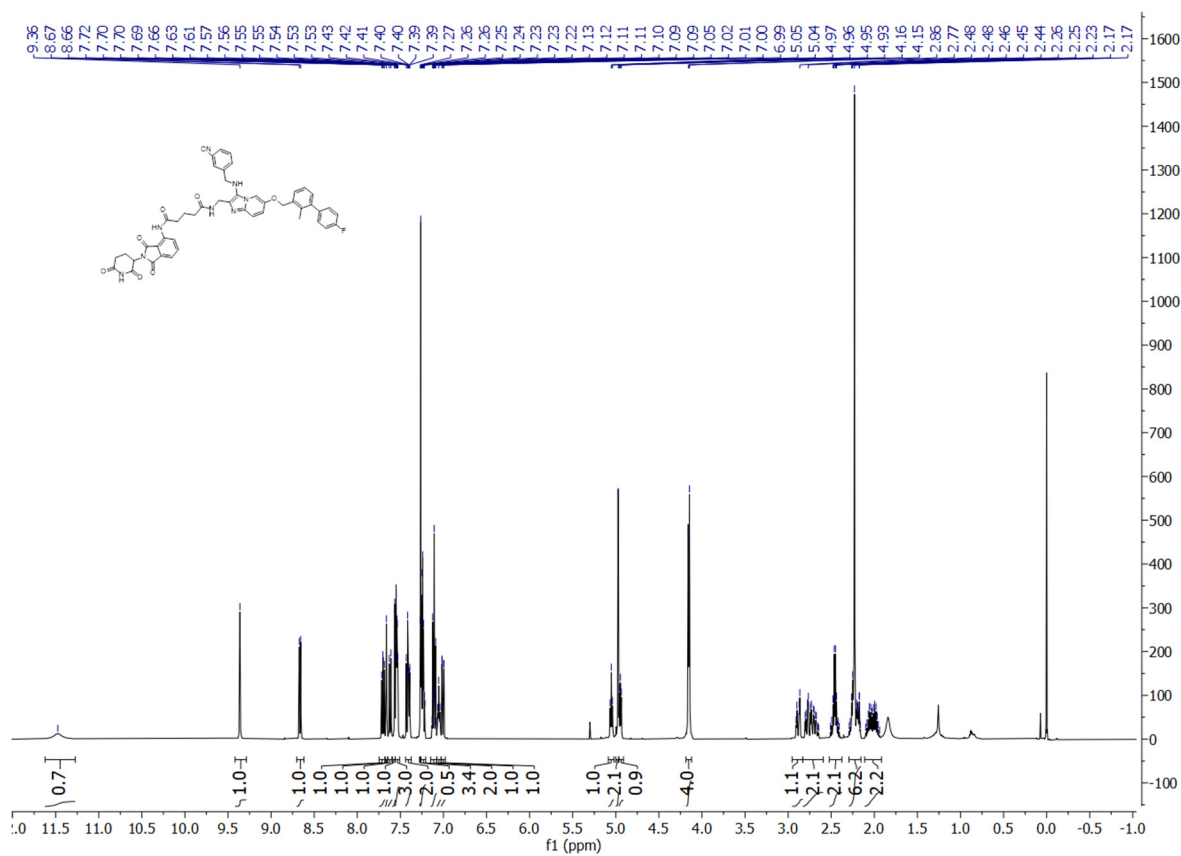

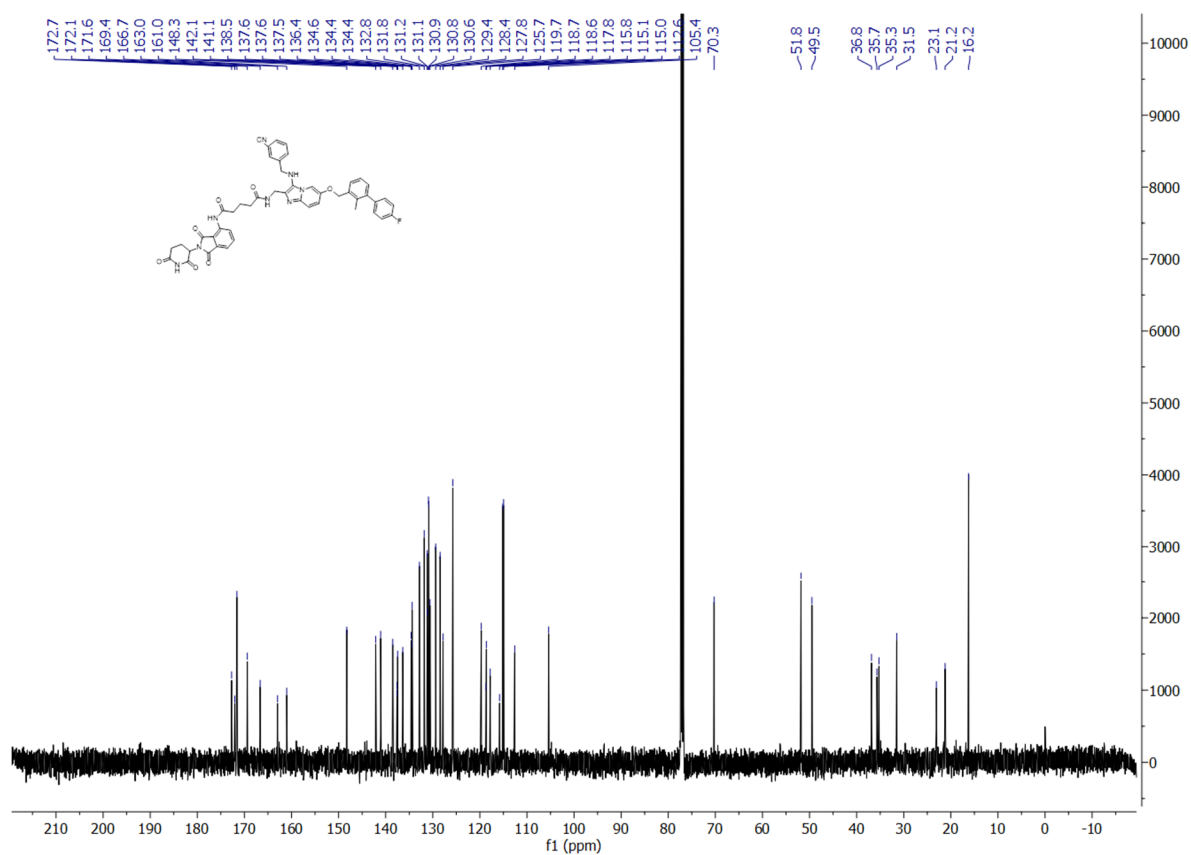

**Figure S11.** N1-((3-((3-cyanobenzyl)amino)-6-((4'-fluoro-2-methyl-[1,1'-biphenyl]-3-yl)methoxy)imidazo[1,2-a]pyridin-2-yl)methyl)-N5-(2-(2,6-dioxopiperidin-3-yl)-1,3-dioxoisindolin-4-yl)glutaramide (**12**).

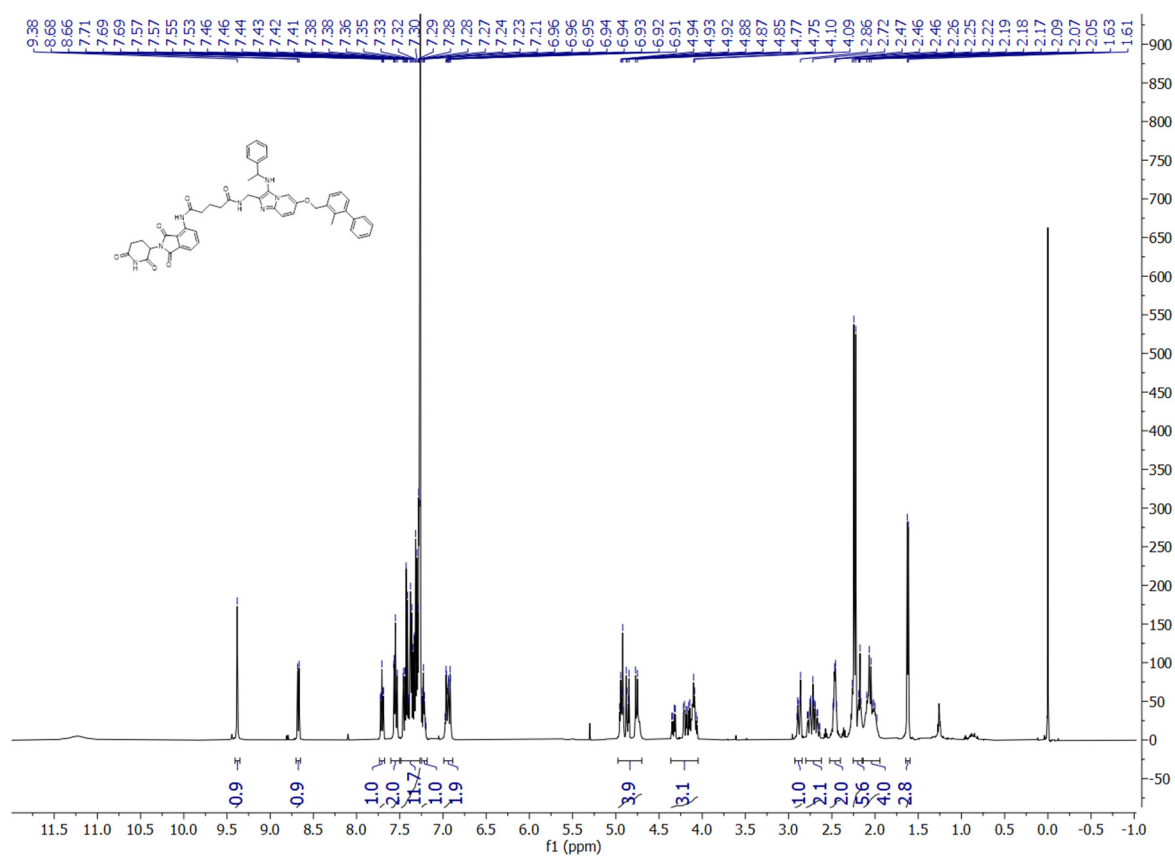

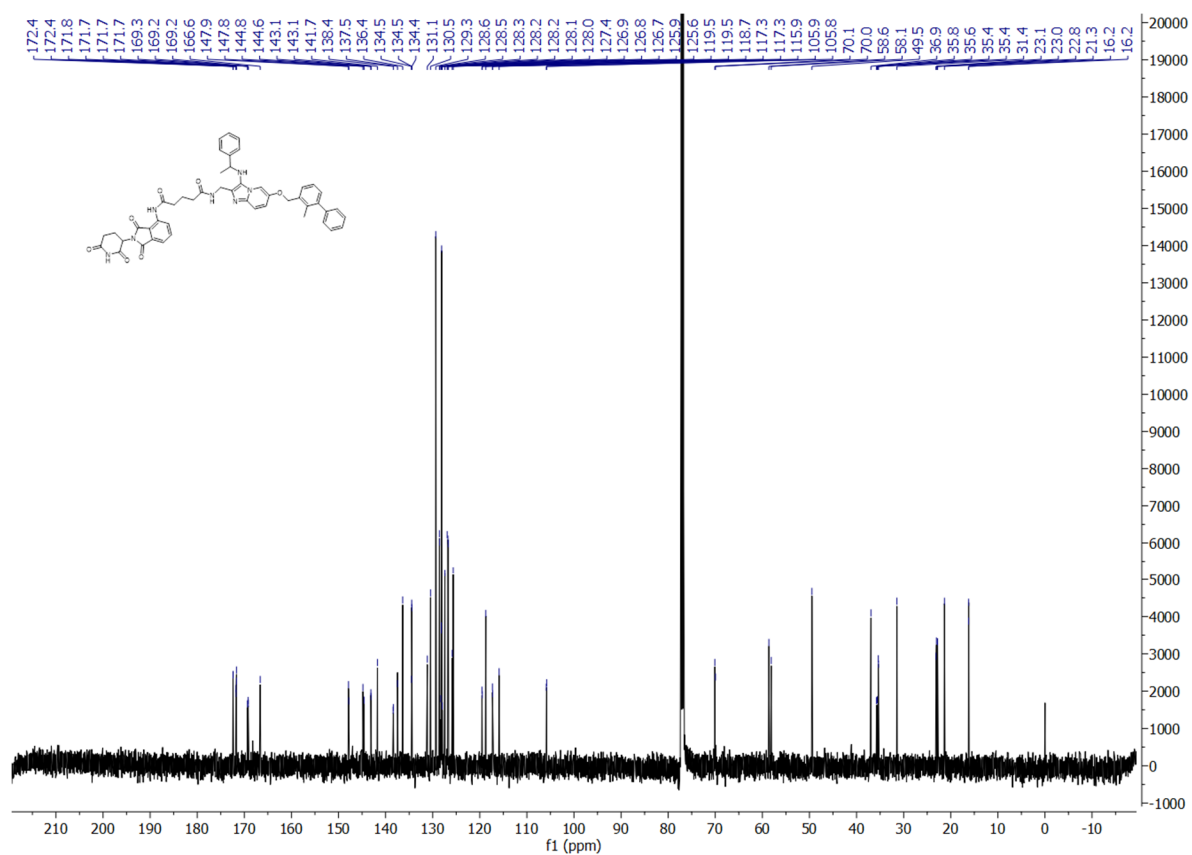

**Figure S12.** N1-(2-(2,6-dioxopiperidin-3-yl)-1,3-dioxoisindolin-4-yl)-N5-((6-((2-methyl-[1,1'-biphenyl]-3-yl)methoxy)-3-((1-phenylethyl)amino)imidazo[1,2-a]pyridin-2-yl)methyl)glutaramide (13).
